# Supplementary material for: Complex coastlines responding to climate change: do shoreline shapes reflect present forcing or “remember” the distant past?
Source: Copernicus journal article supplement (doi:10.5194/esurf-4-871-2016), 2016-12-02
Supplement: Supplementary file 1 [file esurf-4-871-2016-supplement.zip]

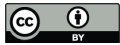

## *Supplement of*

# **Complex coastlines responding to climate change: do shoreline shapes reflect present forcing or “remember” the distant past?**

**Christopher W. Thomas et al.**

*Correspondence to:* Christopher W. Thomas (cwt@bgs.ac.uk)

- esurf-4-871-2016-supplement-title-page.pdf
- Animations
  - Animations rubric.docx
  - Capes models
    - \* 1000YrsU0.55A0.5Static.mp4
    - \* 1000YrsU0.7-0.45A0.5Trans100.mp4
    - \* 1000YrsU0.7-0.55A0.5Trans100.mp4
    - \* 250YrsU0.7-0.45A0.5NoTrans.mp4
    - \* 500YrU0.7-0.45A0.5NoTrans.mp4
    - \* 500YrU0.7-0.55A0.5NoTrans.mp4
    - \* 900YrsU0.7-0.45A0.5NoTrans.mp4
    - \* 900YrsU0.7-0.55A0.5NoTrans.mp4
    - \* Thumbs.db
  - Spits models
    - \* 1000YrsU0.55A0.7Static.mp4
    - \* 1000YrsU0.7-0.45A0.7Trans100.mp4
    - \* 1000YrsU0.7-0.55A0.7Trans100.mp4
    - \* 250YrsU0.7-0.45A0.7NoTrans.mp4
    - \* 500YrU0.7-0.45A0.7NoTrans.mp4
    - \* 500YrU0.7-0.55A0.7NoTrans.mp4
    - \* 900YrU0.7-0.45A0.7NoTrans.mp4
    - \* 900YrU0.7-0.55A0.7NoTrans.mp4
    - \* Thumbs.db
- DiffusiveScaling\_Tables
  - Diffusive Scaling Data.docx
  - Table S1 Cape e-folding times.docx



- Table S2 Spit e-folding times.docx
- Figure4RawData
  - CapesA0.5U0.55Static
  - CapesA0.5U0.7\_0.45Trans
  - CapesA0.5U0.7\_0.55Trans
  - Figure4RawDataPlots.xlsx
  - SpitsA0.7U0.55Static
  - SpitsA0.7U0.7\_0.45Trans
  - SpitsA0.7U0.7\_0.55Trans

- Figure5RawData
  - CapesA0.5U0.55Static
  - CapesA0.5U0.7\_0.45NoTrans
  - CapesA0.5U0.7\_0.55NoTrans
  - SpitsA0.7U0.55Static
  - SpitsA0.7U0.7\_0.45NoTrans
  - SpitsA0.7U0.7\_0.55NoTrans

The copyright of individual parts of the supplement might differ from the CC-BY 3.0 licence.
