# Supplementary material for: Complex coastlines responding to climate change: do shoreline shapes reflect present forcing or “remember” the distant past?
Source: Copernicus journal article supplement (doi:10.5194/esurf-4-871-2016), 2016-12-02
Supplement: Supplementary file 3 [file Table S1 Cape e-folding times.docx]

| Models |  | Time1 | Wavelength2 | Amplitude3 | Aspect ratio4 |
| --- | --- | --- | --- | --- | --- |
| 250 | 1 e-fold | 5 | 4311 | 400 | 0.093 |
| 900 | 1 e-fold | 20 | 8905 | 932 | 0.105 |
| Ratios | 250/900 | 0.25 | 0.48 | 0.43 | 0.89 |
|  |  |  |  |  |  |
| Ratio proportions | 250/900 | **0.25** | **0.23** | 0.18 | 0.78 |
|  |  |  | (WL ratio)2 |  |  |
|  |  |  |  |  |  |
|  |  |  |  |  |  |
| Models |  | Time | Wavelength | Amplitude | Aspect ratio |
| 250 | 2 e-fold | 18 | 6524 | 208 | 0.032 |
| 900 | 2 e-fold | 80 | 13154 | 507 | 0.039 |
| Ratios | 250/900 | 0.23 | 0.50 | 0.41 | 0.82 |
|  |  |  |  |  |  |
| Ratio proportions | 250/900 | **0.23** | **0.25** | 0.17 | 0.67 |
|  |  |  | (WL ratio)2 |  |  |

**Table S1**. First and second e-folding times for capes. Time varies proportionally with the square of the characteristic wavelength, indicating diffusive scaling.

1: Time The time at which aspect ratio has reduced by 1/e or 1/e2 after the instantaneous change in wave climate from ***U*** = 0.7 to ***U*** = 0.45

2: Wavelength The average wavelength (m), from cape tip to cape tip, in each model

3: Amplitude The average perpendicular cross-shore distance (m) between cape tip and adjacent cape bay in each model

4: Aspect ratio The average amplitude/average wavelength

See Figure S1 for an illustration of the wavelength and amplitude metrics for capes.
