# Supplementary material for: Complex coastlines responding to climate change: do shoreline shapes reflect present forcing or “remember” the distant past?
Source: Copernicus journal article supplement (doi:10.5194/esurf-4-871-2016), 2016-12-02
Supplement: Supplementary file 4 [file Table S2 Spit e-folding times.docx]

| Models |  | Time1 | Wavelength2 | Amplitude3 | Aspect ratio4 |
| --- | --- | --- | --- | --- | --- |
| 250 year | 1 e-fold | 20 | 7196 | 861 | 0.120 |
| 900 year | 1 e-fold | 90 | 14727 | 2408 | 0.163 |
| Ratios | 250/900 | 0.22 | 0.49 | 0.36 | 0.74 |
|  |  |  |  |  |  |
| Ratio proportions | 250/900 | **0.22** | **0.24** | 0.13 | 0.54 |
|  |  |  | (WL ratio)2 |  |  |
|  |  |  |  |  |  |
| Models |  | Time | Wavelength | Amplitude | Aspect ratio |
| 250 year | 2 e-fold | 55 | 8755 | 384 | 0.044 |
| 900 year | 2 e-fold | 320 | 21700 | 1295 | 0.060 |
| Ratios | 250/900 | 0.17 | 0.40 | 0.30 | 0.73 |
|  |  |  |  |  |  |
| Ratio proportions | 250/900 | **0.17** | **0.16** | 0.09 | 0.54 |
|  |  |  | (WL ratio)2 |  |  |

**Table S2**. First and second e-folding times for spits, showing that time varies proportionally with the square of the characteristic wavelength, indicating diffusive scaling.

1: Time The time at which spit aspect ratio has reduced by 1/e or 1/e2 after the instantaneous change in wave climate from ***U*** = 0.7 to ***U*** = 0.45

2: Wavelength The average wavelength (m), between the most seaward points of adjacent spits, in each model

3: Amplitude The average perpendicular cross-shore distance (m) between the most seaward point of the spit tip and the inshore coastline projected onshore perpendicular from the spit tip, in each model.

4: Aspect ratio The average amplitude/average wavelength

See Figure S2 for an illustration of the wavelength and amplitude metrics for spits.
