# Supplementary material for: Complex coastlines responding to climate change: do shoreline shapes reflect present forcing or “remember” the distant past?
Source: Copernicus journal article supplement (doi:10.5194/esurf-4-871-2016), 2016-12-02
Supplement: Supplementary file 5 [file Figure4RawDataPlots.xlsx]

## Sheet: CapesA0.5U0.7_0.45Trans
Decade	MeanWL	MeanAmp	MeanAsp
1	1830	367	0.201
2	2415	633	0.262
3	2833	761	0.269
4	3148	848	0.269
5	3482	900	0.259
6	3722	939	0.252
7	3954	1034	0.261
8	4995	1348	0.27
9	5127	1359	0.265
10	5420	1531	0.283
11	5423	1512	0.279
12	5755	1683	0.292
13	5934	1640	0.276
14	5591	1581	0.283
15	6132	1728	0.282
16	5597	1647	0.294
17	6800	2020	0.297
18	6569	1920	0.292
19	6807	1897	0.279
20	7063	2111	0.299
21	7070	2008	0.284
22	6763	1989	0.294
23	6090	1729	0.284
24	5655	1640	0.29
25	5539	1560	0.282
26	7304	1963	0.269
27	7132	1845	0.259
28	7132	1744	0.244
29	6748	1499	0.222
30	7368	1377	0.187
31	9379	1600	0.171
32	9374	1416	0.151
33	9368	1153	0.123
34	10453	1031	0.099
35	11444	880	0.077
36	12179	844	0.069
37	12207	717	0.059
38	11862	586	0.049
39	12850	575	0.045
40	12867	508	0.039
41	12792	423	0.033
42	12892	416	0.032
43	12900	386	0.03
44	14082	391	0.028
45	14082	364	0.026
46	15500	378	0.024
47	14091	314	0.022
48	17233	361	0.021
49	17233	340	0.02
50	17233	322	0.019
51	16590	303	0.018
52	17233	284	0.016
53	17233	268	0.016
54	17233	253	0.015
55	17222	243	0.014
56	17222	238	0.014
57	17222	222	0.013
58	17211	208	0.012
59	17200	195	0.011
60	17200	184	0.011
61	17200	177	0.01
62	17189	175	0.01
63	17178	162	0.009
64	17167	154	0.009
65	17167	145	0.008
66	19288	147	0.008
67	17144	131	0.008
68	17133	126	0.007
69	15410	106	0.007
70	17111	112	0.007
71	19238	113	0.006
72	19225	122	0.006
73	19200	102	0.005
74	17056	91	0.005
75	19175	93	0.005
76	19175	91	0.005
77	19150	88	0.005
78	21871	96	0.004
79	21843	92	0.004
80	24160	117	0.005
81	21829	101	0.005
82	30520	123	0.004
83	30520	115	0.004
84	30500	112	0.004
85	30460	108	0.004
86	30460	104	0.003
87	30400	101	0.003
88	36833	106	0.003
89	37950	97	0.003
90	30340	91	0.003
91	30320	89	0.003
92	37850	89	0.002
93	30280	84	0.003
94	30240	83	0.003
95	27725	81	0.003
96	30220	78	0.003
97	37725	73	0.002
98	30160	72	0.002
99	37650	69	0.002
100	18825	43	0.002

## Sheet: CapesA0.5U0.7_0.55Trans
Decade	MeanWL	MeanAmp	MeanAsp
1	1830	367	0.201
2	2415	633	0.262
3	2833	761	0.269
4	3148	848	0.269
5	3482	900	0.259
6	3722	939	0.252
7	3954	1034	0.261
8	4995	1348	0.27
9	5127	1359	0.265
10	5420	1531	0.283
11	5423	1512	0.279
12	5755	1683	0.292
13	5934	1640	0.276
14	5591	1581	0.283
15	6132	1728	0.282
16	5597	1647	0.294
17	6800	2020	0.297
18	6569	1920	0.292
19	6807	1897	0.279
20	7063	2111	0.299
21	7070	2008	0.284
22	6763	1989	0.294
23	6090	1729	0.284
24	5655	1640	0.29
25	5539	1560	0.282
26	7304	1993	0.273
27	7752	2107	0.272
28	7429	1978	0.266
29	6933	1681	0.242
30	7752	1839	0.237
31	5940	1308	0.22
32	8100	1678	0.207
33	9379	1702	0.181
34	9374	1555	0.166
35	8476	1272	0.15
36	9358	1264	0.135
37	9878	1227	0.124
38	9867	1181	0.12
39	9861	1164	0.118
40	11081	1257	0.113
41	11069	1236	0.112
42	10400	1174	0.113
43	11793	1374	0.116
44	12150	1429	0.118
45	12143	1441	0.119
46	12143	1477	0.122
47	11340	1301	0.115
48	12143	1387	0.114
49	12143	1386	0.114
50	11340	1265	0.112
51	12157	1326	0.109
52	12150	1335	0.11
53	10006	1124	0.112
54	12157	1346	0.111
55	12143	1409	0.116
56	12136	1442	0.119
57	12143	1449	0.119
58	12150	1367	0.113
59	12157	1339	0.11
60	11360	1244	0.11
61	12164	1329	0.109
62	11367	1206	0.106
63	12171	1358	0.112
64	10659	1093	0.103
65	12193	1281	0.105
66	9656	1004	0.104
67	11892	1247	0.105
68	11892	1268	0.107
69	9718	930	0.096
70	8658	841	0.097
71	11892	1254	0.105
72	11043	1175	0.106
73	12883	1283	0.1
74	12883	1313	0.102
75	9694	911	0.094
76	12883	1369	0.106
77	12883	1354	0.105
78	12883	1331	0.103
79	12883	1318	0.102
80	12892	1327	0.103
81	12883	1367	0.106
82	12883	1413	0.11
83	12883	1400	0.109
84	12883	1389	0.108
85	12883	1347	0.105
86	12708	1409	0.111
87	11771	1184	0.101
88	11900	1270	0.107
89	12883	1301	0.101
90	12883	1350	0.105
91	14055	1493	0.106
92	12883	1347	0.105
93	10281	1056	0.103
94	14055	1497	0.107
95	14055	1522	0.108
96	14055	1539	0.11
97	14055	1443	0.103
98	14045	1421	0.101
99	13808	1501	0.109
100	12883	1350	0.105

## Sheet: CapesA0.5U0.55Static
Decade	MeanWL	MeanAmp	MeanAsp
1	1716	62	0.036
2	1937	117	0.061
3	2016	170	0.084
4	2329	190	0.082
5	2571	200	0.078
6	2829	237	0.084
7	2868	262	0.091
8	3094	309	0.1
9	3362	324	0.096
10	3367	364	0.108
11	3554	348	0.098
12	3688	419	0.114
13	4567	426	0.093
14	4569	507	0.111
15	4567	458	0.1
16	4359	495	0.114
17	4921	557	0.113
18	5050	569	0.113
19	5053	511	0.101
20	5053	582	0.115
21	5192	549	0.106
22	4368	535	0.123
23	5403	601	0.111
24	5741	621	0.108
25	5929	601	0.101
26	5929	587	0.099
27	5573	584	0.105
28	5200	629	0.121
29	5932	680	0.115
30	5932	687	0.116
31	5935	681	0.115
32	5935	708	0.119
33	5935	617	0.104
34	5935	573	0.096
35	6213	580	0.093
36	6133	550	0.09
37	6133	527	0.086
38	6345	553	0.087
39	5833	532	0.091
40	6341	566	0.089
41	6133	551	0.09
42	6341	600	0.095
43	5935	617	0.104
44	7077	703	0.099
45	7077	730	0.103
46	6815	741	0.109
47	7658	755	0.099
48	7650	757	0.099
49	7726	796	0.103
50	8082	808	0.1
51	8082	790	0.098
52	8082	807	0.1
53	6654	686	0.103
54	8082	833	0.103
55	8082	900	0.111
56	7408	850	0.115
57	7730	894	0.116
58	8467	895	0.106
59	8467	871	0.103
60	8467	872	0.103
61	9358	965	0.103
62	9358	932	0.1
63	9353	1010	0.108
64	8467	887	0.105
65	9358	933	0.1
66	9358	938	0.1
67	9358	943	0.101
68	9358	969	0.104
69	8895	871	0.098
70	7404	740	0.1
71	9358	963	0.103
72	8890	927	0.104
73	9872	937	0.095
74	9353	921	0.098
75	10094	960	0.095
76	9353	980	0.105
77	10094	1028	0.102
78	10100	1005	0.1
79	10100	1001	0.099
80	10094	1003	0.099
81	10529	1105	0.105
82	10100	1092	0.108
83	11447	1224	0.107
84	11447	1213	0.106
85	11453	1169	0.102
86	11447	1203	0.105
87	9900	1069	0.108
88	11447	1205	0.105
89	11453	1120	0.098
90	11447	1183	0.103
91	11447	1206	0.105
92	11453	1173	0.102
93	9779	1039	0.106
94	11453	1202	0.105
95	11447	1227	0.107
96	11453	1243	0.109
97	11453	1151	0.1
98	12271	1220	0.099
99	11453	1187	0.104
100	11453	1188	0.104

## Sheet: SpitsA0.7U0.7_0.45Trans
Decade	MeanWL	MeanAmp	MeanAsp
1	1819	394	0.217
2	2589	759	0.293
3	3177	1056	0.333
4	3882	1287	0.331
5	3400	1134	0.333
6	4939	1799	0.364
7	5054	1926	0.381
8	6240	2486	0.398
9	6247	2497	0.4
10	6055	2452	0.405
11	5641	2314	0.41
12	5938	2486	0.419
13	7571	2986	0.394
14	7264	2931	0.403
15	9075	3716	0.41
16	9070	3799	0.419
17	6954	2992	0.43
18	9826	4163	0.424
19	9335	4065	0.435
20	8467	3864	0.456
21	8890	3678	0.414
22	7468	3114	0.417
23	9300	4073	0.438
24	9832	4084	0.415
25	10282	4575	0.445
26	10881	4508	0.414
27	11620	4705	0.405
28	9689	3828	0.395
29	8725	3328	0.381
30	9683	3599	0.372
31	13400	4828	0.36
32	13392	4651	0.347
33	11600	3834	0.33
34	14500	4504	0.311
35	11593	3393	0.293
36	12421	3436	0.277
37	17390	4513	0.26
38	15800	3886	0.246
39	15782	3718	0.236
40	17350	3895	0.225
41	17889	4240	0.237
42	11440	2135	0.187
43	18588	3792	0.204
44	18588	3623	0.195
45	12392	2314	0.187
46	16533	2939	0.178
47	18600	3099	0.167
48	18600	2956	0.159
49	16533	2531	0.153
50	16544	2436	0.147
51	17480	2457	0.141
52	18613	2533	0.136
53	13438	1756	0.131
54	18638	2338	0.125
55	18625	2265	0.122
56	21300	2505	0.118
57	16567	1896	0.114
58	21300	2335	0.11
59	18650	1973	0.106
60	16567	1686	0.102
61	21300	2107	0.099
62	16870	1423	0.084
63	16578	1540	0.093
64	18650	1669	0.089
65	21314	1831	0.086
66	21329	1765	0.083
67	18663	1494	0.08
68	24900	1939	0.078
69	24917	1860	0.075
70	29900	2002	0.067
71	21371	1491	0.07
72	21371	1440	0.067
73	21386	1385	0.065
74	24967	1564	0.063
75	24983	1511	0.06
76	24967	1477	0.059
77	24983	1439	0.058
78	25000	1393	0.056
79	25000	1350	0.054
80	25033	1310	0.052
81	25017	1280	0.051
82	25033	1252	0.05
83	25050	1210	0.048
84	25050	1193	0.048
85	25083	1156	0.046
86	25083	1127	0.045
87	25117	1099	0.044
88	25133	1069	0.043
89	25167	1035	0.041
90	30220	1214	0.04
91	29325	1307	0.045
92	30400	1158	0.038
93	30460	1136	0.037
94	30480	1113	0.037
95	30500	1092	0.036
96	30520	1074	0.035
97	30520	1041	0.034
98	30560	1016	0.033
99	30560	996	0.033
100	30580	978	0.032

## Sheet: SpitsA0.7U0.7_0.55Trans
Decade	MeanWL	MeanAmp	MeanAsp
1	1819	394	0.217
2	2589	759	0.293
3	3177	1056	0.333
4	3882	1287	0.331
5	3407	1108	0.325
6	4939	1799	0.364
7	5054	1926	0.381
8	6240	2486	0.398
9	6247	2497	0.4
10	6055	2452	0.405
11	5641	2314	0.41
12	5938	2486	0.419
13	7571	2986	0.394
14	7264	2931	0.403
15	9075	3716	0.41
16	9070	3799	0.419
17	6954	2992	0.43
18	9767	4195	0.43
19	9335	4065	0.435
20	8467	3864	0.456
21	8890	3678	0.414
22	7468	3114	0.417
23	9300	4073	0.438
24	9832	4084	0.415
25	10282	4575	0.445
26	10881	4522	0.416
27	10894	4469	0.41
28	10253	4153	0.405
29	10265	4063	0.396
30	9683	3807	0.393
31	11620	4600	0.396
32	14608	5791	0.396
33	13554	5202	0.384
34	13400	4831	0.361
35	10888	3799	0.349
36	9811	3370	0.343
37	12443	4050	0.325
38	14508	4611	0.318
39	12429	3885	0.313
40	15809	4864	0.308
41	15827	4736	0.299
42	12414	3675	0.296
43	15617	4389	0.281
44	14475	4256	0.294
45	11660	3459	0.297
46	18650	5501	0.295
47	12633	4122	0.326
48	12625	4088	0.324
49	13564	4156	0.306
50	13564	3860	0.285
51	14920	4169	0.279
52	19425	4982	0.256
53	11038	3230	0.293
54	14136	3561	0.252
55	15550	3909	0.251
56	15560	3928	0.252
57	13477	3593	0.267
58	15936	4273	0.268
59	14164	3656	0.258
60	15580	3799	0.244
61	17322	4206	0.243
62	13492	3427	0.254
63	19488	4684	0.24
64	13108	3524	0.269
65	17478	4840	0.277
66	19513	4541	0.233
67	17356	4039	0.233
68	10011	2684	0.268
69	19538	4493	0.23
70	19538	4492	0.23
71	14545	3857	0.265
72	17378	3960	0.228
73	11457	3004	0.262
74	19563	4369	0.223
75	19563	4335	0.222
76	13515	3163	0.234
77	13515	3172	0.235
78	10341	2396	0.232
79	15982	3672	0.23
80	17422	3799	0.218
81	13531	3093	0.229
82	19600	4260	0.217
83	15670	3386	0.216
84	13531	3061	0.226
85	15690	3329	0.212
86	13531	3034	0.224
87	16060	3922	0.244
88	19625	4107	0.209
89	19625	4034	0.206
90	14675	3194	0.218
91	17444	3565	0.204
92	17456	3535	0.203
93	17456	3531	0.202
94	16009	3393	0.212
95	17456	3480	0.199
96	17922	4128	0.23
97	16018	3323	0.207
98	17620	3619	0.205
99	14692	3013	0.205
100	13217	2859	0.216

## Sheet: SpitsA0.7U0.55Static
Time	MeanWL	MeanAmp	MeanASP
10	1749	66	0.0377
20	1872	123	0.0658
30	2116	196	0.0925
40	2349	223	0.095
50	2700	259	0.0959
60	2980	282	0.0947
70	3170	343	0.1083
80	3334	404	0.1211
90	3717	431	0.1159
100	4060	555	0.1367
110	4233	567	0.1339
120	4414	670	0.1517
130	4911	656	0.1335
140	4340	644	0.1483
150	5326	727	0.1364
160	3354	517	0.154
170	5624	861	0.153
180	5797	906	0.1562
190	5984	917	0.1532
200	5984	950	0.1588
210	6397	993	0.1553
220	4956	834	0.1682
230	4939	798	0.1615
240	6863	1034	0.1507
250	6242	927	0.1485
260	7713	1113	0.1444
270	8048	1183	0.1471
280	8810	1394	0.1582
290	8805	1369	0.1555
300	6003	989	0.1648
310	8795	1434	0.163
320	8714	1505	0.1727
330	8714	1462	0.1677
340	8719	1397	0.1603
350	9155	1451	0.1585
360	8271	1260	0.1524
370	5947	883	0.1485
380	6808	1097	0.1611
390	6132	953	0.1554
400	10194	1600	0.157
410	9622	1552	0.1613
420	6779	1113	0.1643
430	10176	1768	0.1737
440	10171	1774	0.1744
450	7292	1284	0.1761
460	7896	1416	0.1793
470	10159	1722	0.1695
480	10153	1716	0.169
490	9079	1560	0.1718
500	11386	1947	0.171
510	8586	1513	0.1762
520	11493	2009	0.1748
530	10775	1900	0.1764
540	9578	1674	0.1748
550	9668	1777	0.1838
560	8615	1605	0.1863
570	8338	1724	0.2067
580	9068	1688	0.1862
590	8186	1445	0.1765
600	9653	1799	0.1864
610	11487	2102	0.183
620	6123	1129	0.1844
630	11487	2104	0.1832
640	7832	1398	0.1785
650	11487	2057	0.1791
660	11353	2018	0.1777
670	7900	1528	0.1934
680	8000	1483	0.1854
690	10829	1985	0.1833
700	13092	2383	0.182
710	11506	2118	0.184
720	13092	2365	0.1806
730	9126	1733	0.1899
740	12150	2175	0.179
750	11333	2003	0.1767
760	11506	2107	0.1832
770	13077	2367	0.181
780	9695	1787	0.1843
790	10619	1947	0.1833
800	13069	2384	0.1824
810	9689	1817	0.1876
820	11327	2126	0.1877
830	11320	2118	0.1871
840	11313	2096	0.1853
850	14142	2605	0.1842
860	10850	2187	0.2015
870	13046	2433	0.1865
880	14133	2628	0.1859
890	14125	2540	0.1798
900	12107	2201	0.1818
910	10594	1936	0.1828
920	14117	2558	0.1812
930	13031	2398	0.184
940	10228	1879	0.1837
950	13023	2354	0.1807
960	15391	2812	0.1827
970	7796	1551	0.199
980	13157	2434	0.185
990	13323	2653	0.1991
1000	14092	2589	0.1837
